# Supplementary material for: Comparison of three vertically resolved ozone data sets: climatology, trends and radiative forcings
Source: Copernicus journal article supplement (doi:10.5194/acp-13-5533-2013), 2013-06-06
Supplement: Supplementary file 8 [file acp-13-5533-2013-supplement.zip]

S-Table 1. Mean climatological ozone value (in ppmv) for different latitude bands, seasons, and pressure levels, for the three data sets and the Fortuin & Kelder (FK) climatology.

|              | FK   | RW07 | SPARC | BDBP |
|--------------|------|------|-------|------|
| 90°S – 60°S  |      |      |       |      |
| DJF, 100 hPa | 0.91 | 1.10 | 0.92  | 0.93 |
| MAM, 100 hPa | 0.97 | 1.24 | 1.00  | 1.06 |
| JJA, 100 hPa | 1.04 | 1.38 | 1.04  | 1.04 |
| SON, 100 hPa | 0.69 | 0.80 | 0.63  | 0.56 |
| DJF, 70 hPa  | 1.87 | 2.04 | 1.88  | 1.85 |
| MAM, 70 hPa  | 1.90 | 2.22 | 1.94  | 1.94 |
| JJA, 70 hPa  | 1.91 | 2.41 | 1.91  | 1.89 |
| SON, 70 hPa  | 1.30 | 1.43 | 1.17  | 1.02 |
| DJF, 50 hPa  | 2.91 | 2.69 | 2.91  | 2.78 |
| MAM, 50 hPa  | 2.69 | 2.73 | 2.69  | 2.70 |
| JJA, 50 hPa  | 2.73 | 3.00 | 2.70  | 2.70 |
| SON, 50 hPa  | 2.19 | 2.05 | 1.97  | 1.70 |
| DJF, 30 hPa  | 4.23 | 3.90 | 4.12  | 3.70 |
| MAM, 30 hPa  | 3.58 | 3.65 | 3.44  | 3.39 |
| JJA, 30 hPa  | 3.61 | 4.06 | 3.47  | 3.30 |
| SON, 30 hPa  | 3.90 | 3.68 | 3.66  | 3.20 |
| DJF, 10 hPa  | 5.78 | 4.89 | 5.54  | 5.08 |
| MAM, 10 hPa  | 4.80 | 4.63 | 4.52  | 4.05 |
| JJA, 10 hPa  | 4.97 | 5.27 | 4.82  | 4.26 |

|             |      |      |      |      |
|-------------|------|------|------|------|
| SON, 10 hPa | 6.12 | 5.47 | 5.93 | 5.34 |
| DJF, 5 hPa  | 6.12 | 6.23 | 5.96 | 5.66 |
| MAM, 5 hPa  | 5.65 | 6.46 | 5.36 | 4.57 |
| JJA, 5 hPa  | 5.72 | 6.85 | 5.59 | 5.11 |
| SON, 5 hPa  | 6.44 | 6.67 | 6.26 | 5.66 |

30°S – 30°N

|              |      |       |      |      |
|--------------|------|-------|------|------|
| DJF, 100 hPa | 0.17 | 0.32* | 0.14 | 0.12 |
| MAM, 100 hPa | 0.19 | 0.32* | 0.17 | 0.13 |
| JJA, 100 hPa | 0.22 | 0.33* | 0.21 | 0.16 |
| SON, 100 hPa | 0.19 | 0.31* | 0.18 | 0.15 |
| DJF, 70 hPa  | 0.56 | 0.76  | 0.54 | 0.54 |
| MAM, 70 hPa  | 0.60 | 0.79  | 0.58 | 0.55 |
| JJA, 70 hPa  | 0.67 | 0.87  | 0.65 | 0.69 |
| SON, 70 hPa  | 0.68 | 0.89  | 0.66 | 0.69 |
| DJF, 50 hPa  | 1.58 | 1.65  | 1.55 | 1.57 |
| MAM, 50 hPa  | 1.60 | 1.67  | 1.57 | 1.63 |
| JJA, 50 hPa  | 1.75 | 1.79  | 1.72 | 1.77 |
| SON, 50 hPa  | 1.70 | 1.76  | 1.67 | 1.73 |
| DJF, 30 hPa  | 4.10 | 4.06  | 4.08 | 4.14 |
| MAM, 30 hPa  | 4.27 | 4.19  | 4.26 | 4.32 |
| JJA, 30 hPa  | 4.46 | 4.38  | 4.45 | 4.49 |
| SON, 30 hPa  | 4.33 | 4.28  | 4.31 | 4.33 |
| DJF, 10 hPa  | 8.96 | 8.37  | 9.03 | 9.15 |
| MAM, 10 hPa  | 9.19 | 8.53  | 9.25 | 9.48 |

|             |      |      |      |      |
|-------------|------|------|------|------|
| JJA, 10 hPa | 8.79 | 8.31 | 8.84 | 9.03 |
| SON, 10 hPa | 9.06 | 8.46 | 9.12 | 9.28 |
| DJF, 5 hPa  | 8.38 | 9.78 | 8.42 | 8.58 |
| MAM, 5 hPa  | 8.28 | 9.68 | 8.29 | 8.29 |
| JJA, 5 hPa  | 8.23 | 9.69 | 8.25 | 8.27 |
| SON, 5 hPa  | 8.34 | 9.72 | 8.35 | 8.33 |

60°N – 90°N

|              |      |      |      |      |
|--------------|------|------|------|------|
| DJF, 100 hPa | 1.45 | 1.74 | 1.48 | 1.42 |
| MAM, 100 hPa | 1.46 | 1.72 | 1.50 | 1.49 |
| JJA, 100 hPa | 1.02 | 1.20 | 1.05 | 1.06 |
| SON, 100 hPa | 1.04 | 1.25 | 1.06 | 1.07 |
| DJF, 70 hPa  | 2.34 | 2.73 | 2.36 | 2.29 |
| MAM, 70 hPa  | 2.45 | 2.77 | 2.49 | 2.45 |
| JJA, 70 hPa  | 1.85 | 2.03 | 1.89 | 1.90 |
| SON, 70 hPa  | 1.84 | 2.10 | 1.86 | 1.89 |
| DJF, 50 hPa  | 3.22 | 3.30 | 3.18 | 3.15 |
| MAM, 50 hPa  | 3.47 | 3.39 | 3.48 | 3.37 |
| JJA, 50 hPa  | 2.67 | 2.51 | 2.68 | 2.66 |
| SON, 50 hPa  | 2.57 | 2.57 | 2.56 | 2.61 |
| DJF, 30 hPa  | 4.41 | 4.64 | 4.31 | 3.99 |
| MAM, 30 hPa  | 4.59 | 4.55 | 4.54 | 4.32 |
| JJA, 30 hPa  | 3.55 | 3.39 | 3.48 | 3.44 |
| SON, 30 hPa  | 3.58 | 3.58 | 3.44 | 3.41 |
| DJF, 10 hPa  | 5.59 | 5.63 | 5.50 | 4.63 |

|             |      |      |      |      |
|-------------|------|------|------|------|
| MAM, 10 hPa | 6.04 | 5.61 | 5.87 | 5.64 |
| JJA, 10 hPa | 5.68 | 4.75 | 5.40 | 5.36 |
| SON, 10 hPa | 4.74 | 4.57 | 4.47 | 4.19 |
| DJF, 5 hPa  | 5.89 | 7.02 | 5.81 | 5.01 |
| MAM, 5 hPa  | 6.60 | 7.28 | 6.42 | 6.29 |
| JJA, 5 hPa  | 6.11 | 6.27 | 5.94 | 6.17 |
| SON, 5 hPa  | 5.48 | 6.23 | 5.17 | 4.66 |

---

\* not all grid points of the given latitude band have data values at this level



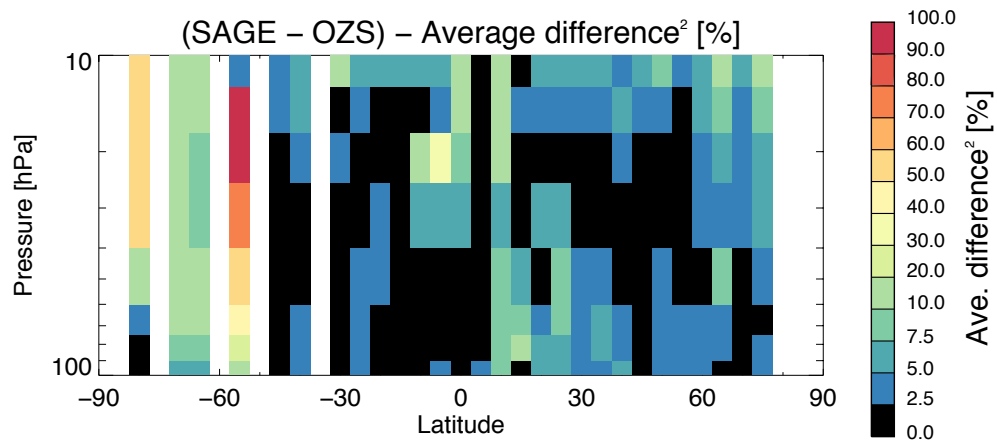

S-Figure 1. Average squared difference between all available monthly mean SAGE II values and ozone sonde values for given latitude bands and pressure levels, given in percent.
