# Supplementary figures and images for: Comparison of three vertically resolved ozone data sets: climatology, trends and radiative forcings
Source: Copernicus journal article supplement (doi:10.5194/acp-13-5533-2013), 2013-06-06

# Latitude band: 15°N to 20°N

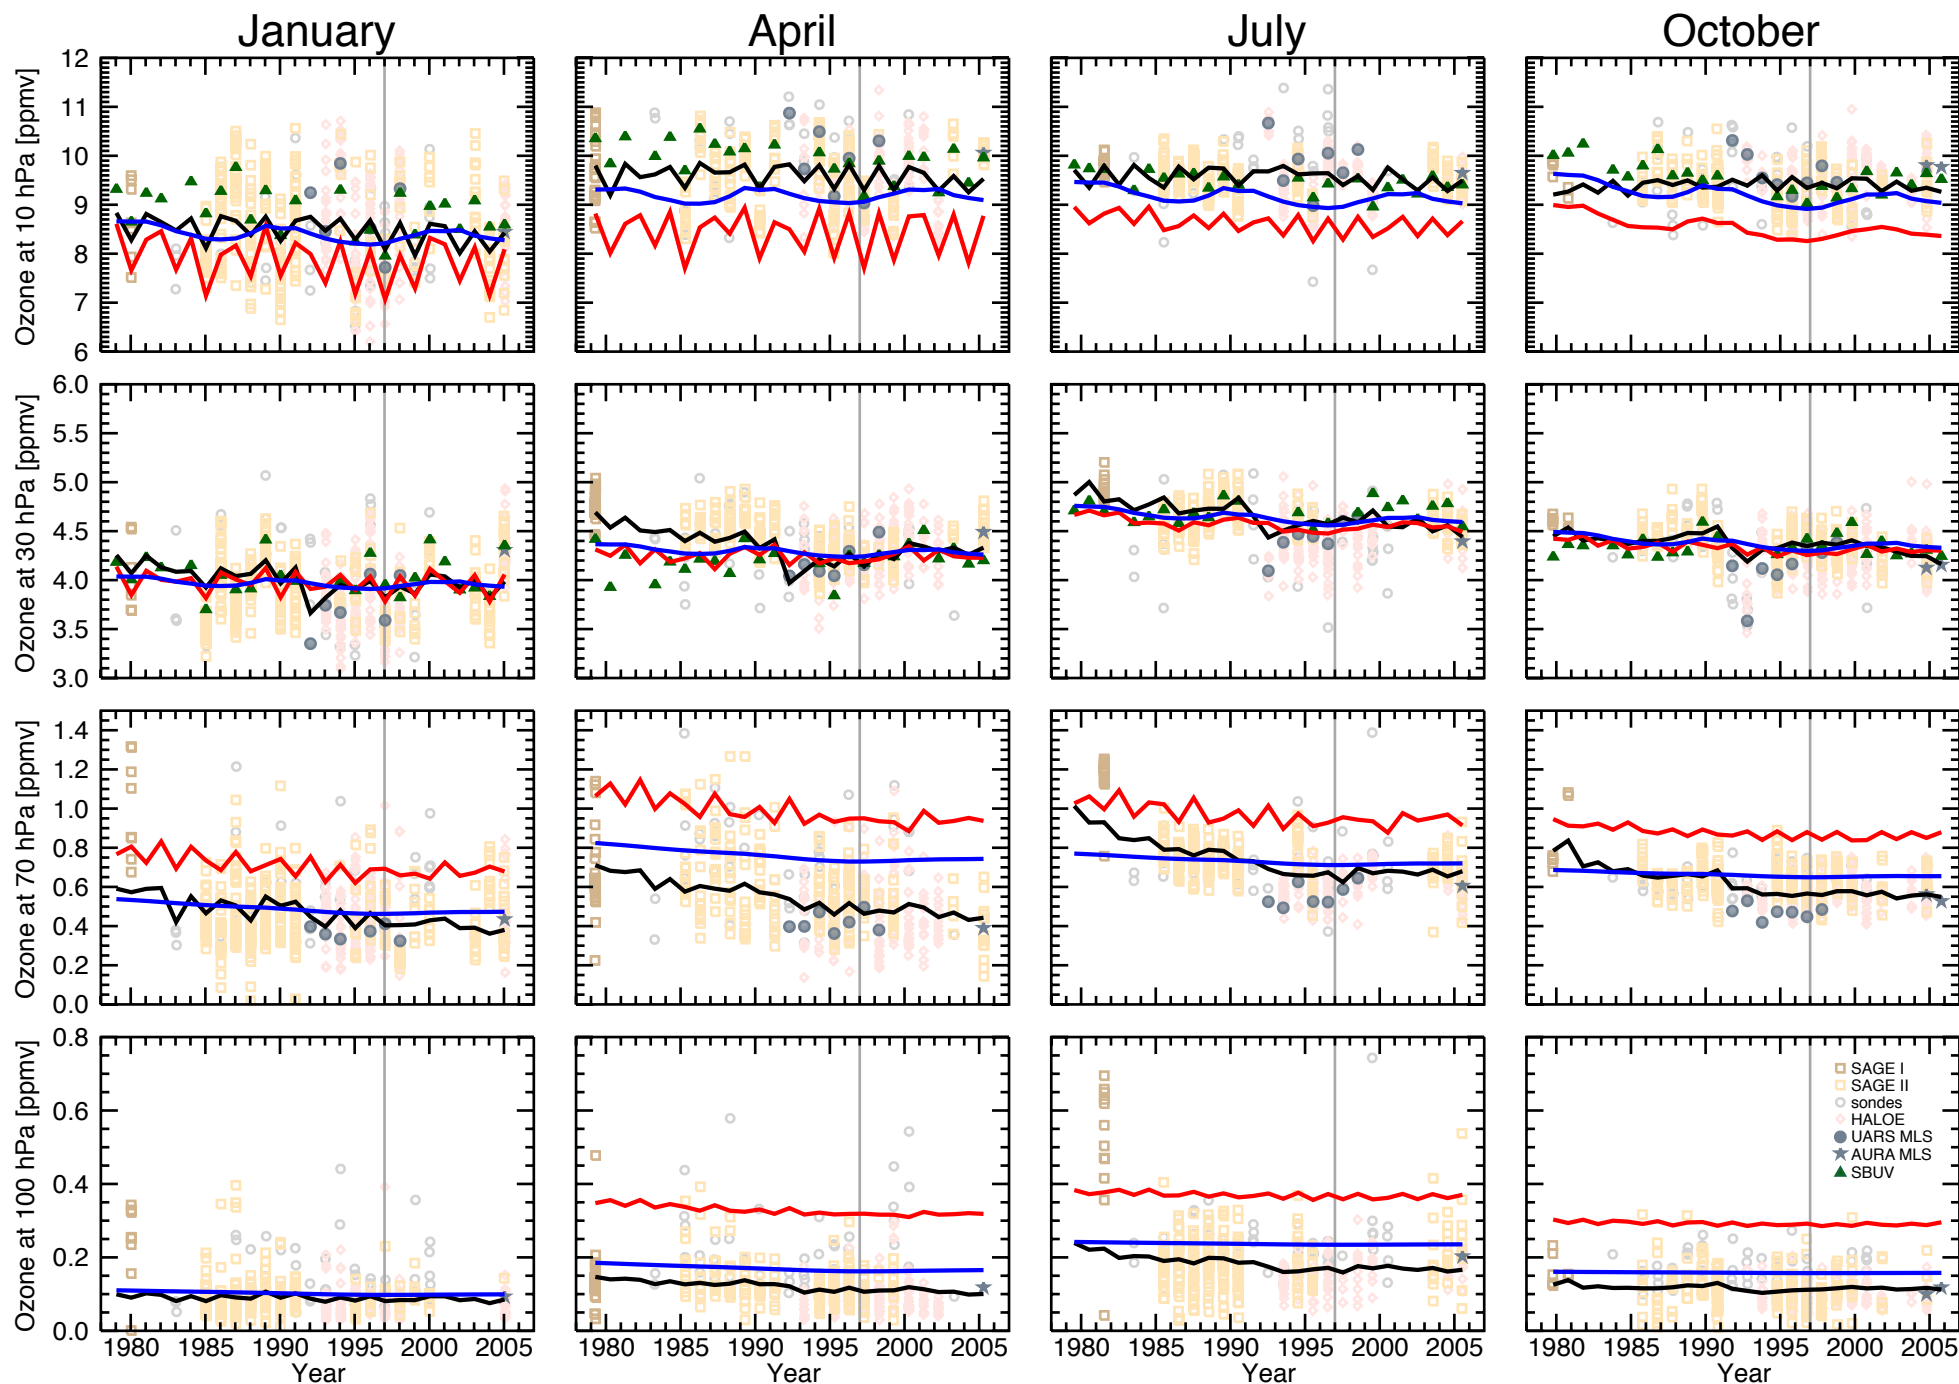

BDBP RW07 SPARC

Supplement: Supplementary file 1 [file acp-13-5533-2013-supplement.zip]

Latitude band: 80°N to 85°N

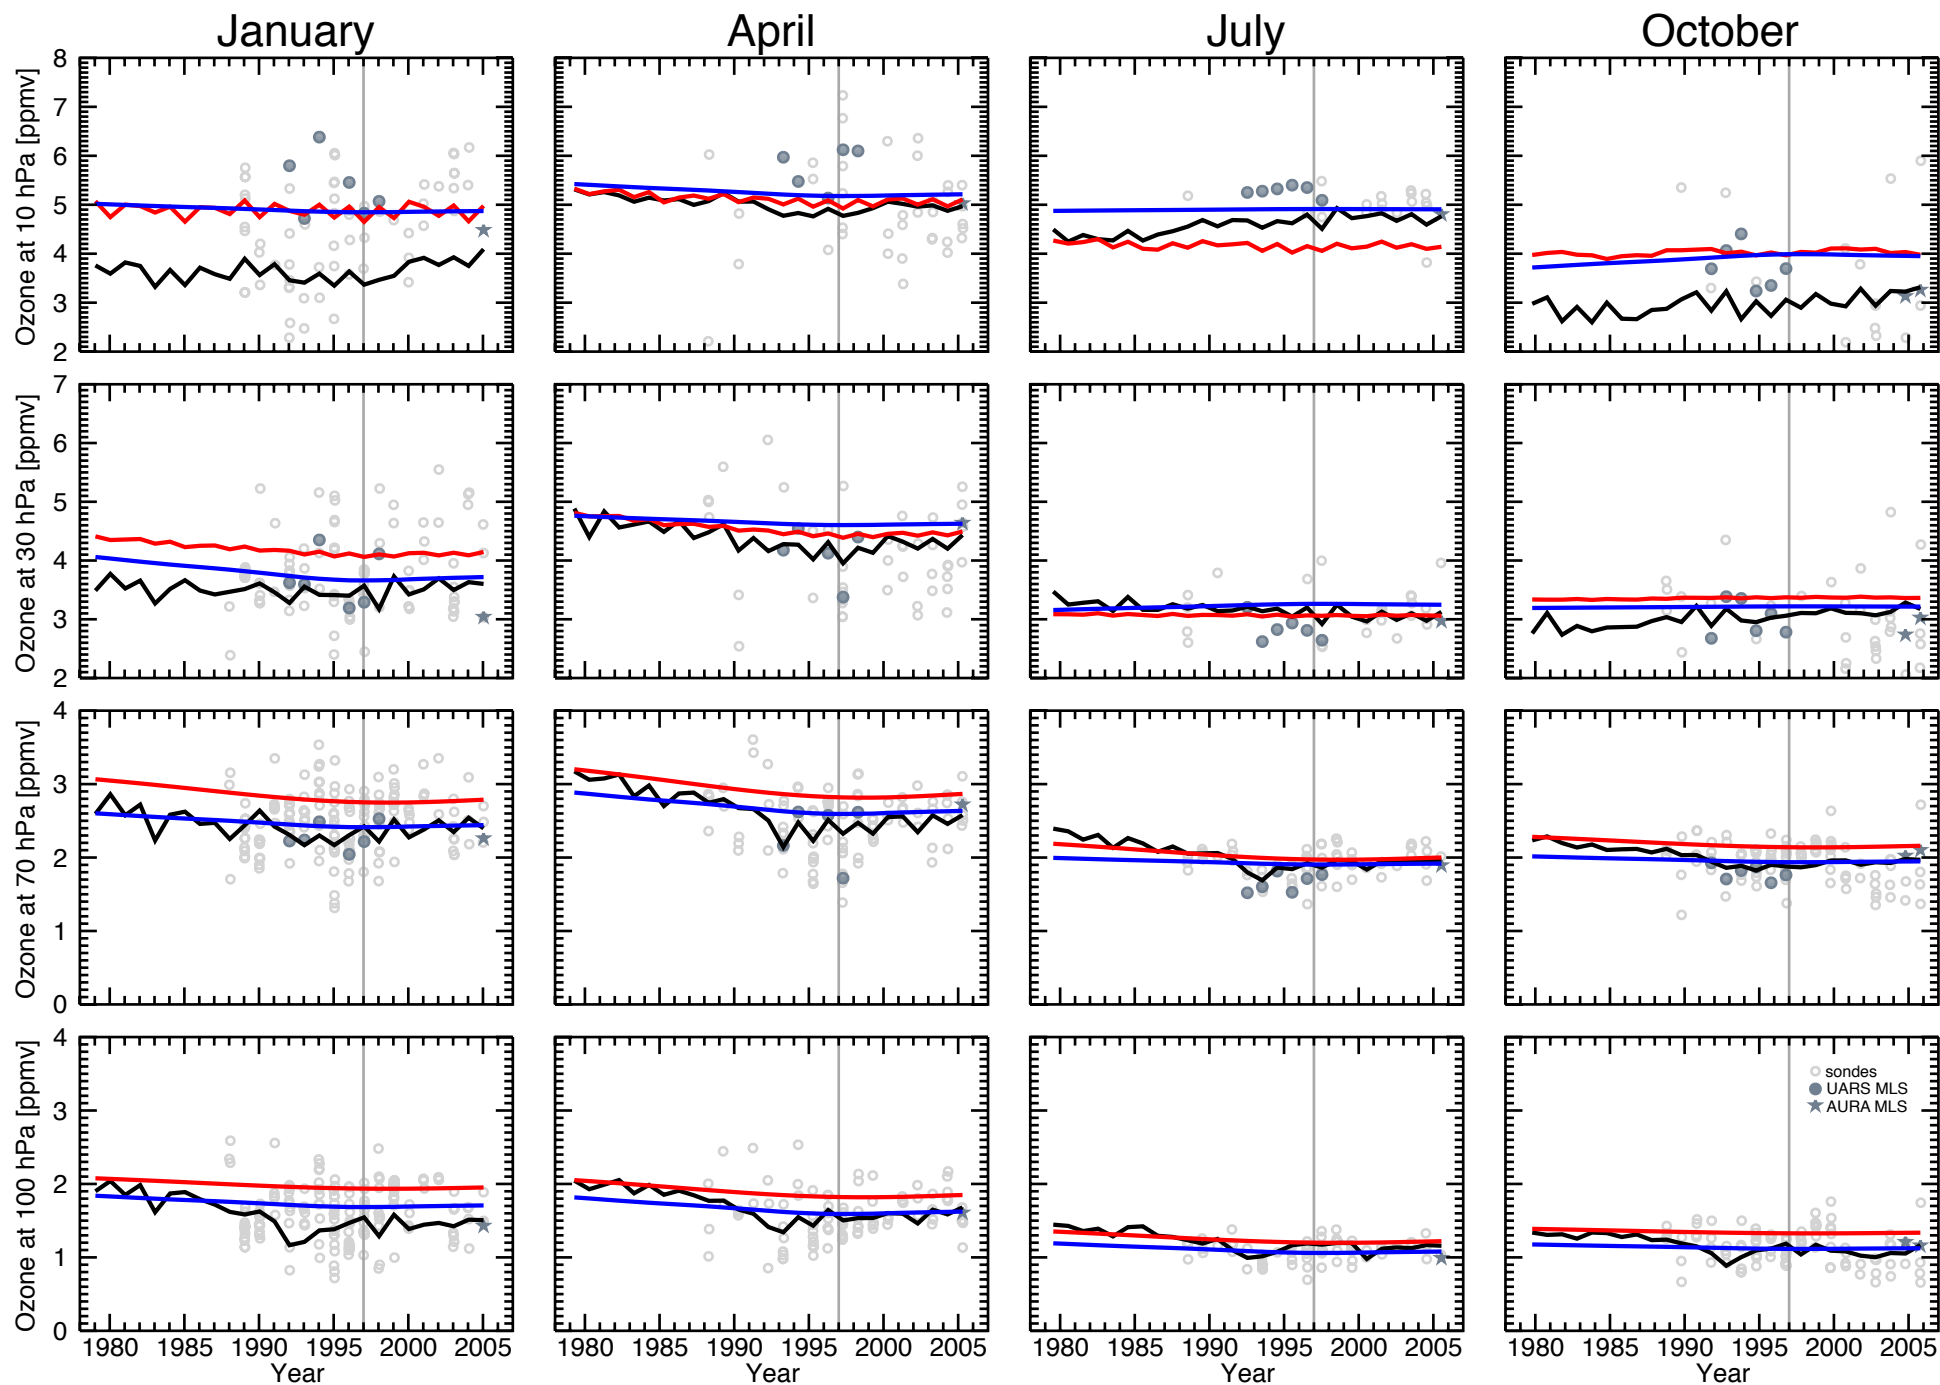

BDBP RW07 SPARC

Supplement: Supplementary file 6 [file acp-13-5533-2013-supplement.zip]

Latitude band: 90°S to 85°S

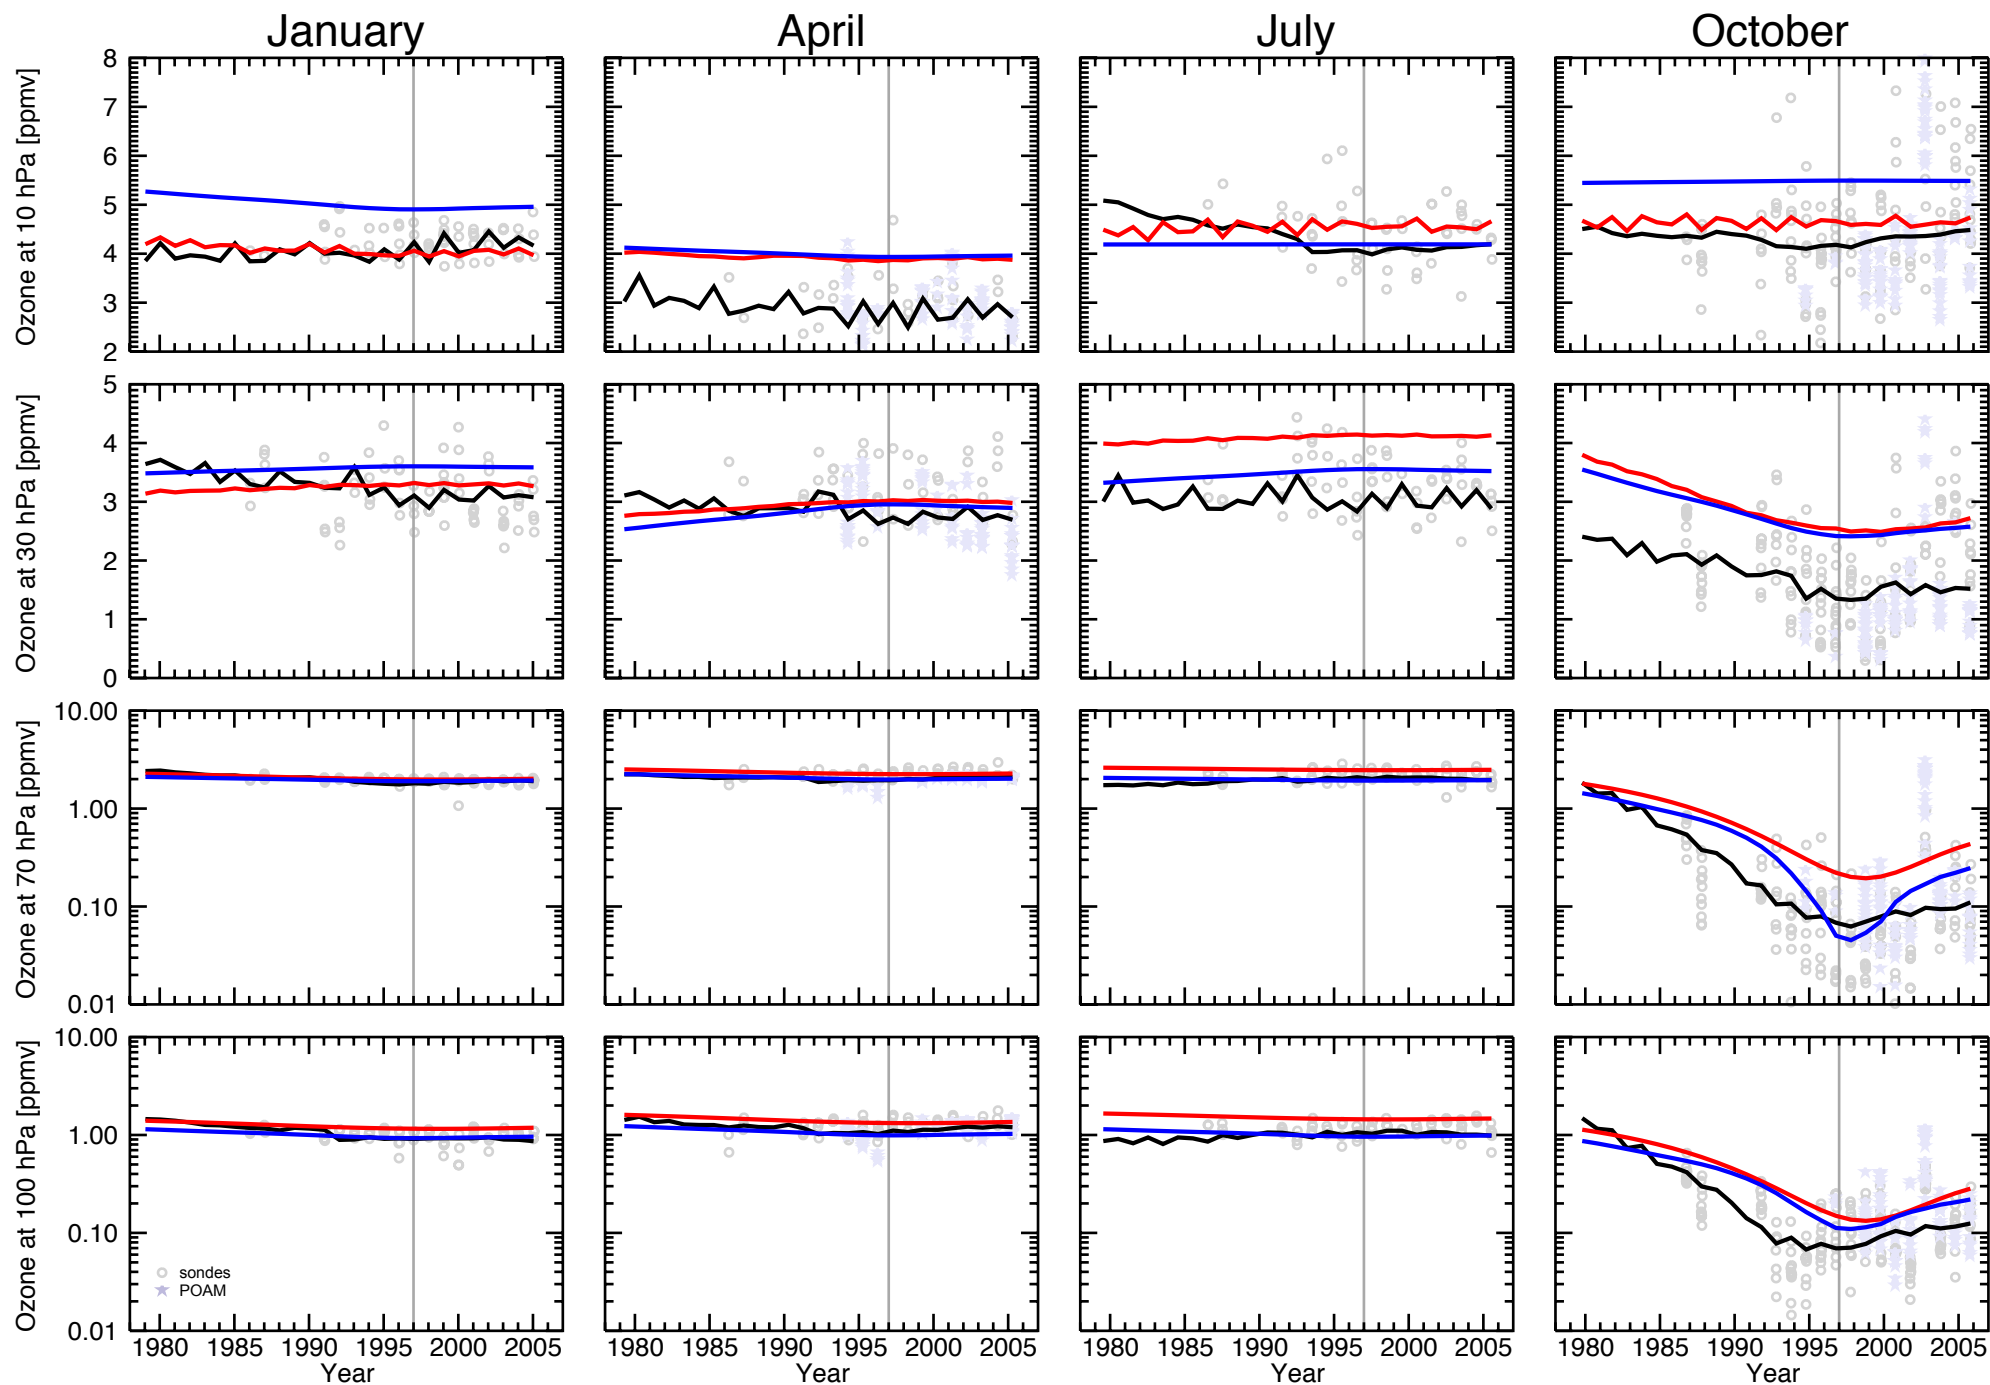

BDBP RW07 SPARC

Supplement: Supplementary file 9 [file acp-13-5533-2013-supplement.zip]

Latitude band: 45°N to 50°N

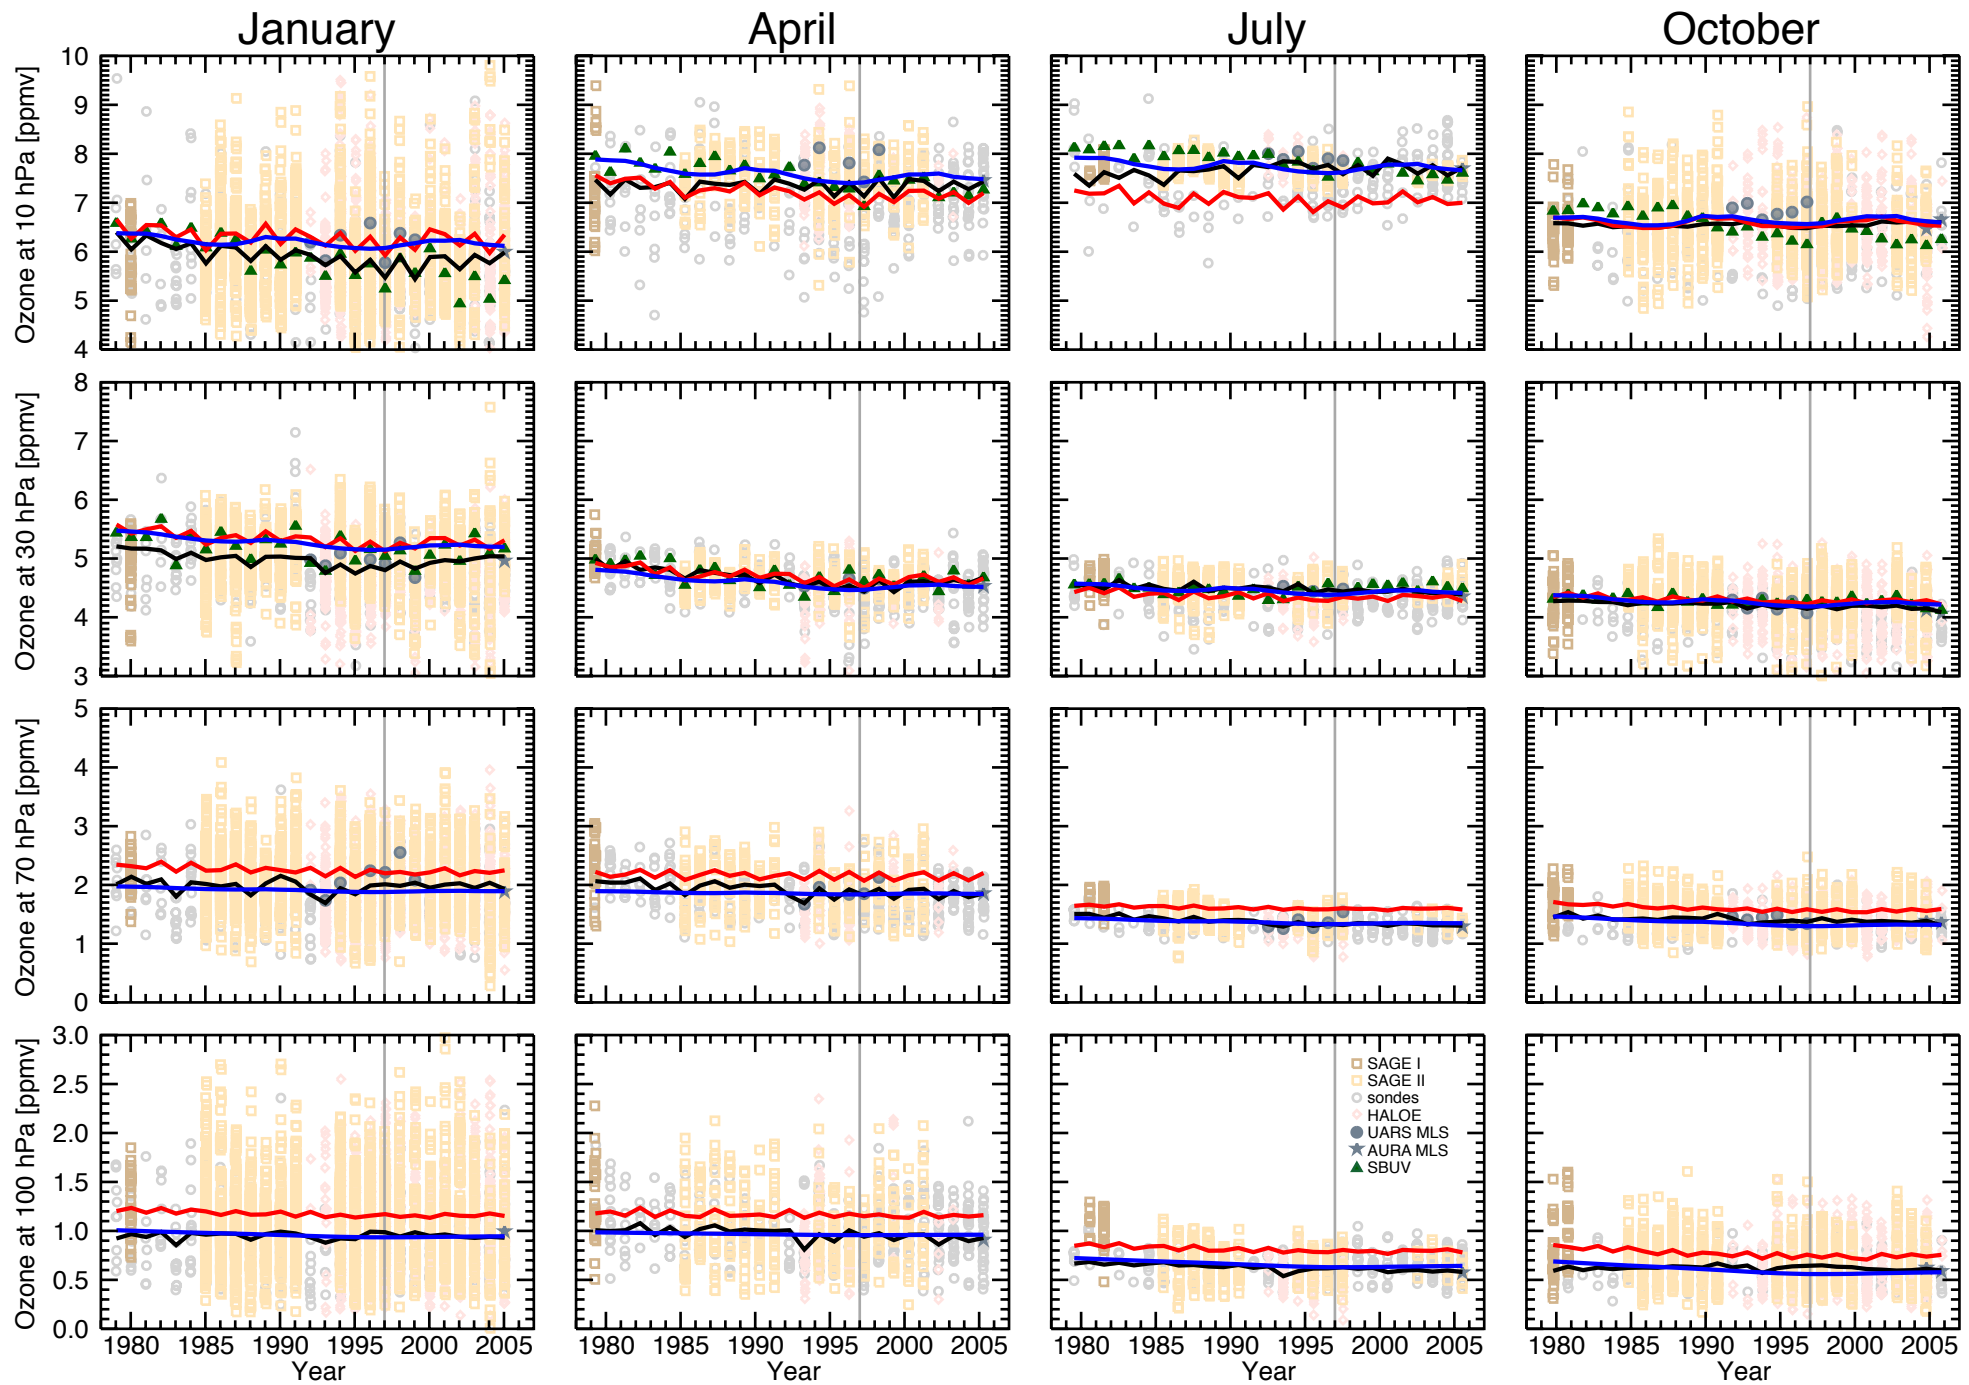

BDBP RW07 SPARC

Supplement: Supplementary file 10 [file acp-13-5533-2013-supplement.zip]

# Latitude band: 30°S to 25°S

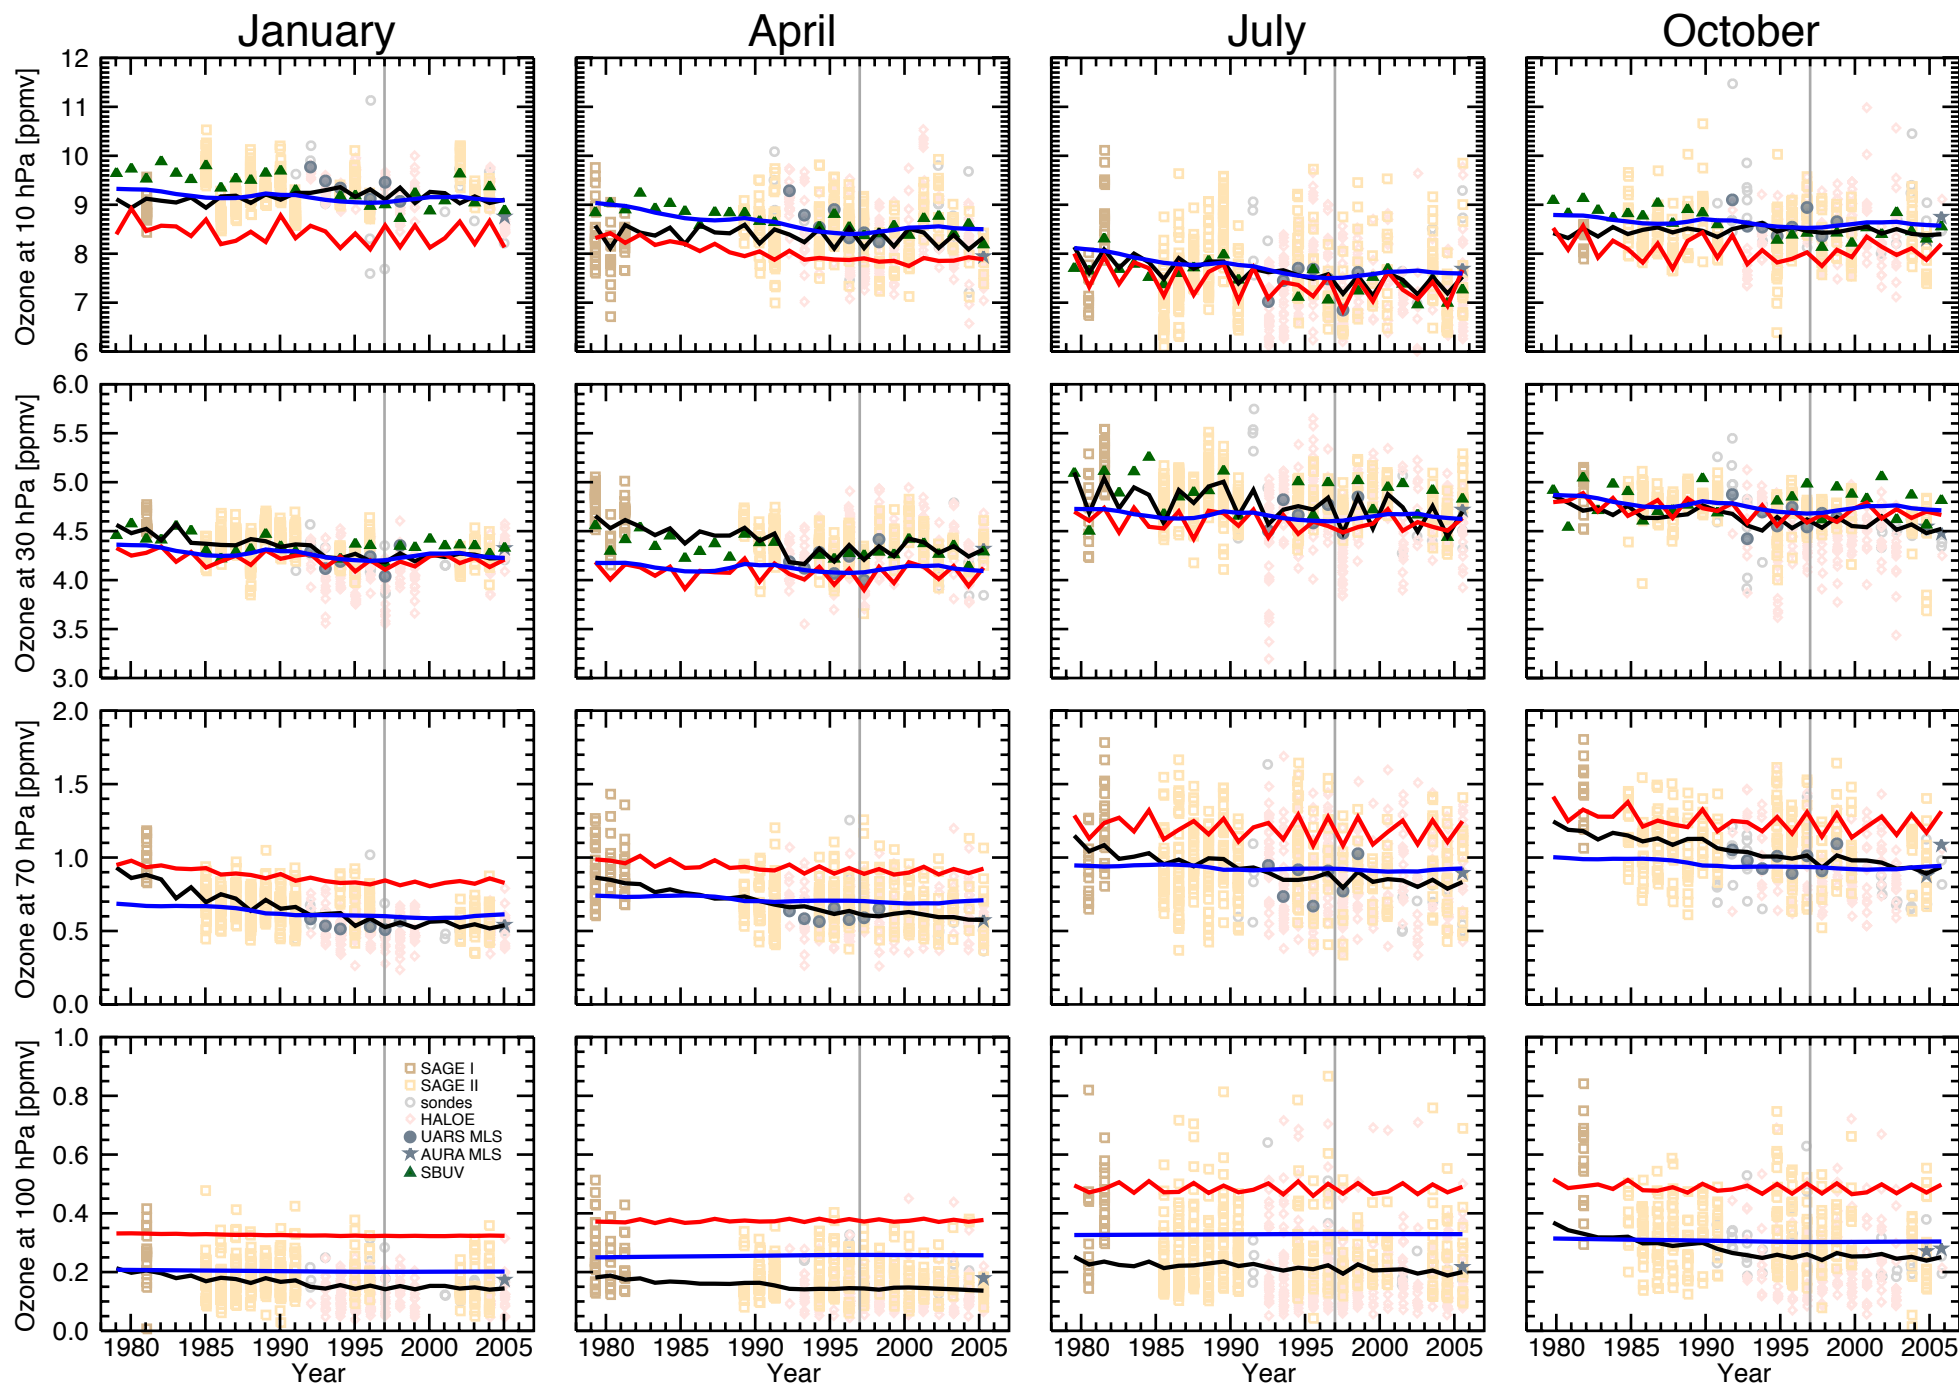

BDBP RW07 SPARC

Supplement: Supplementary file 11 [file acp-13-5533-2013-supplement.zip]

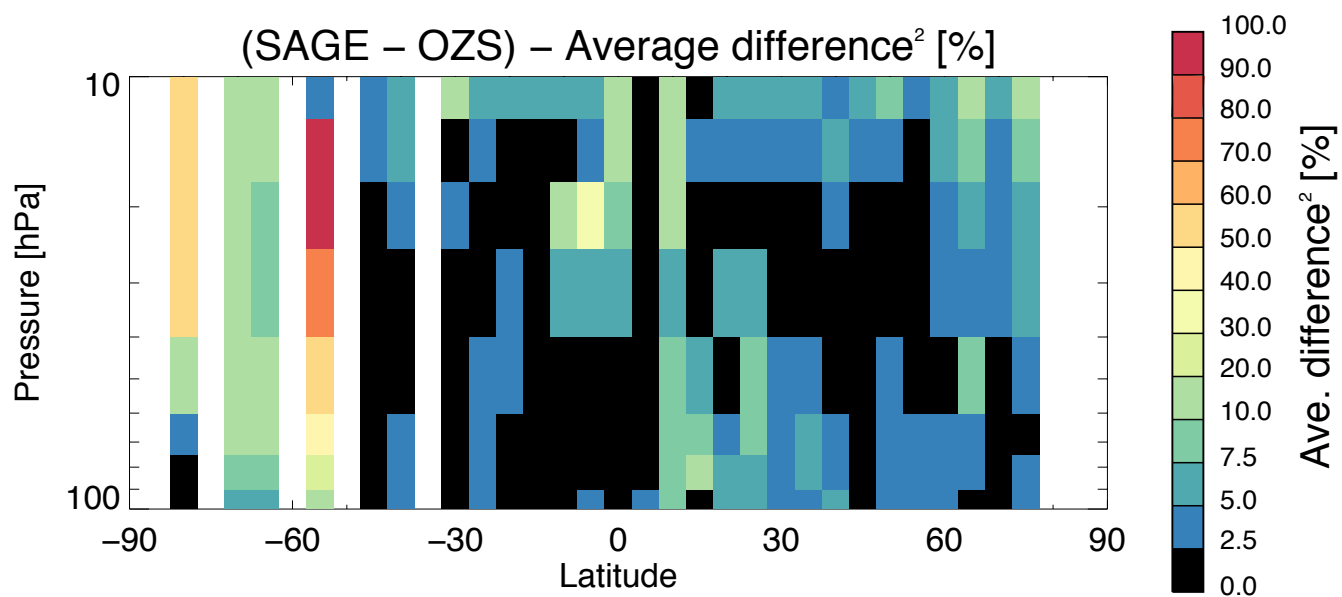

Supplement: Supplementary file 12 [file acp-13-5533-2013-supplement.zip]

Latitude band: 5°S to 5°N

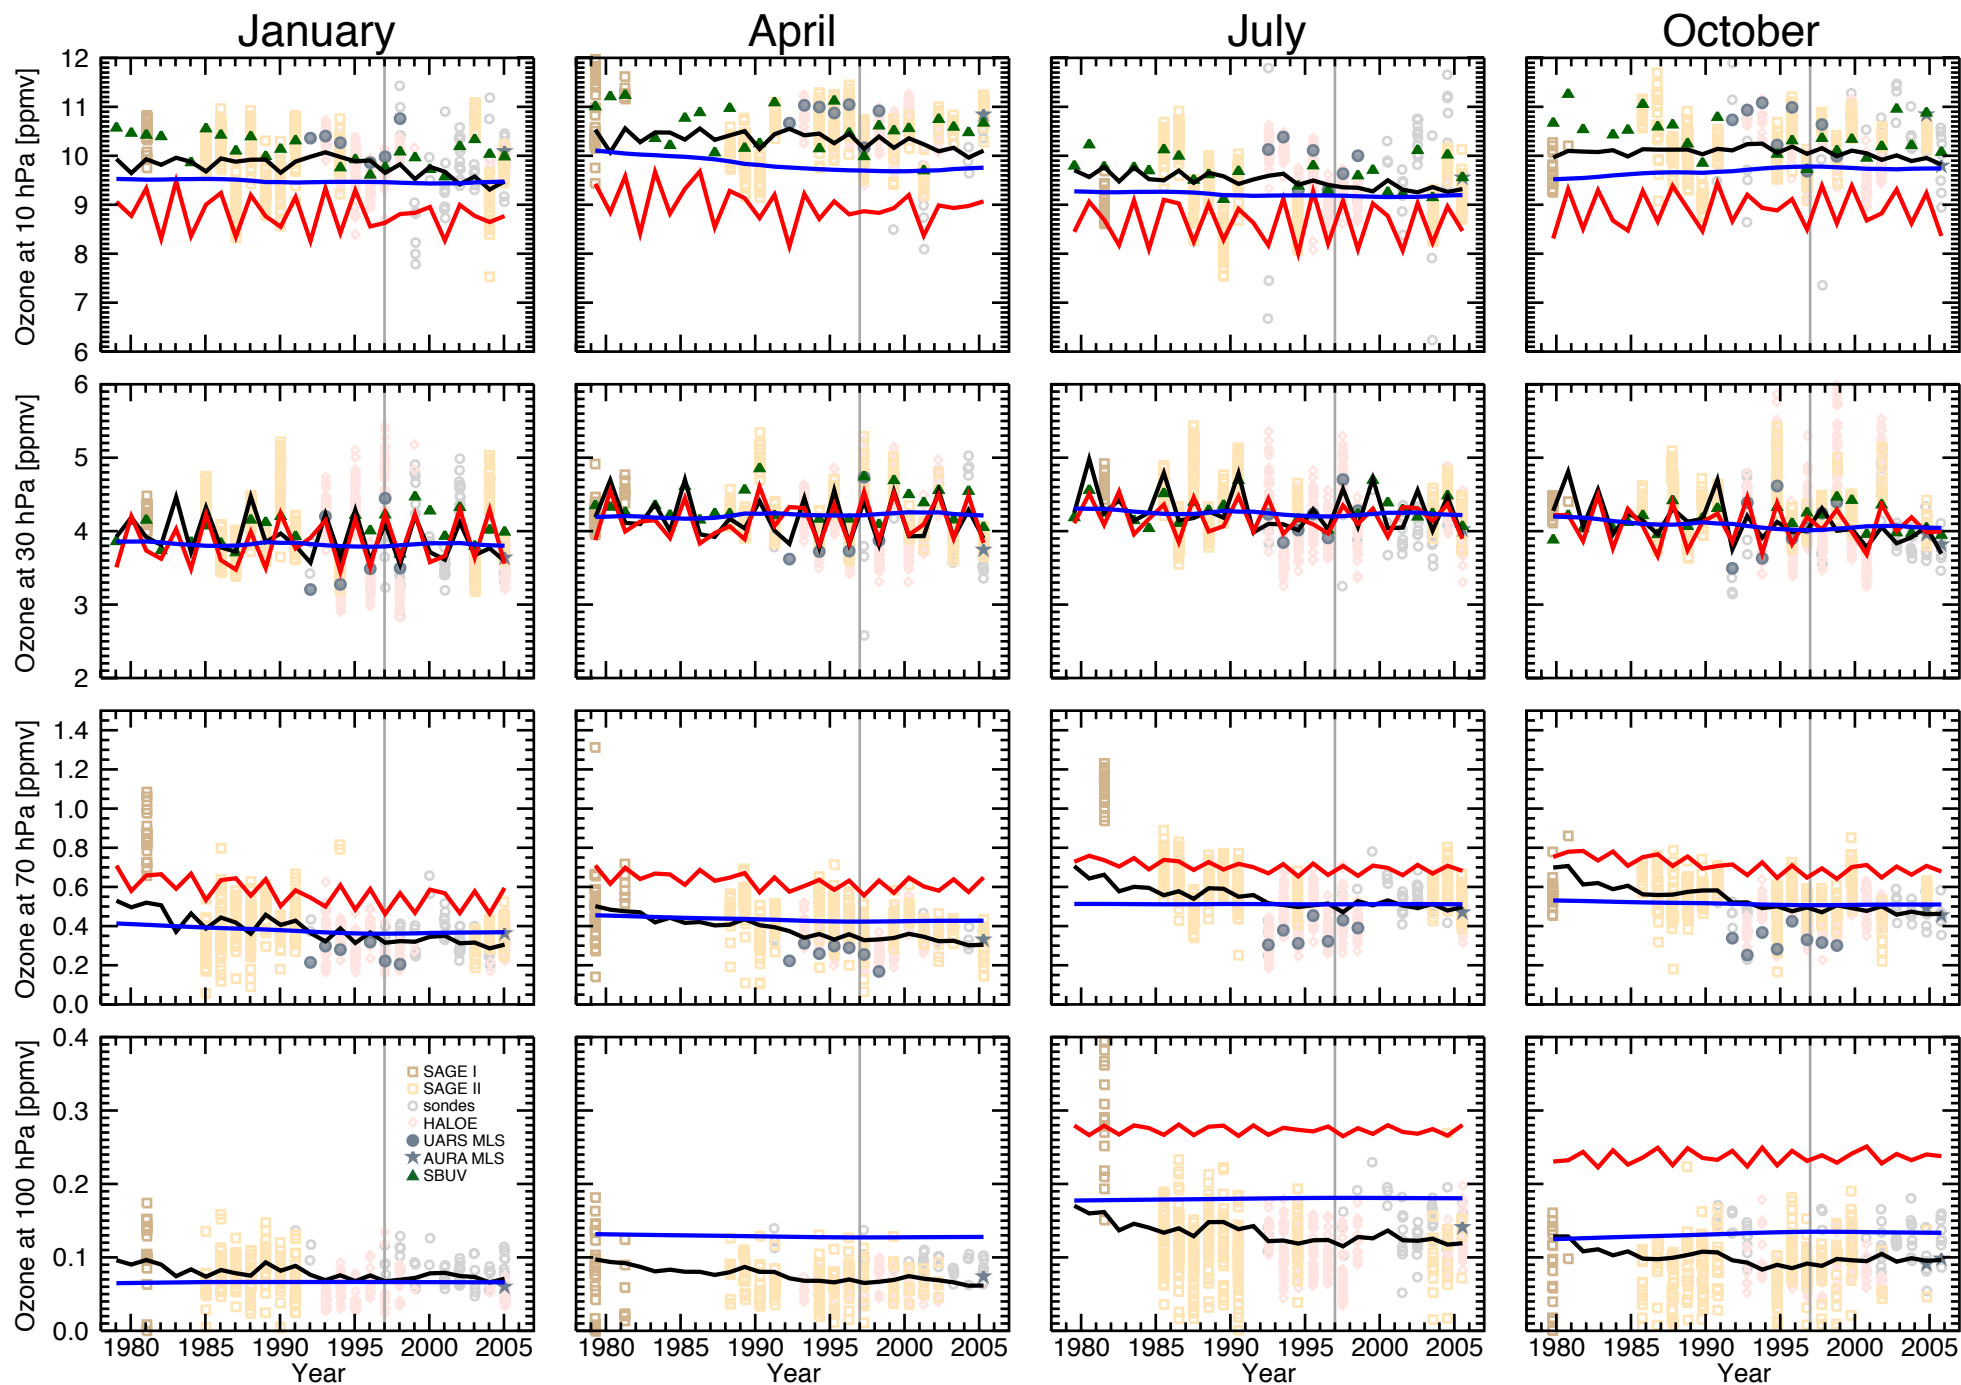

BDBP RW07 SPARC

Supplement: Supplementary file 13 [file acp-13-5533-2013-supplement.zip]

# Latitude band: 65°S to 60°S

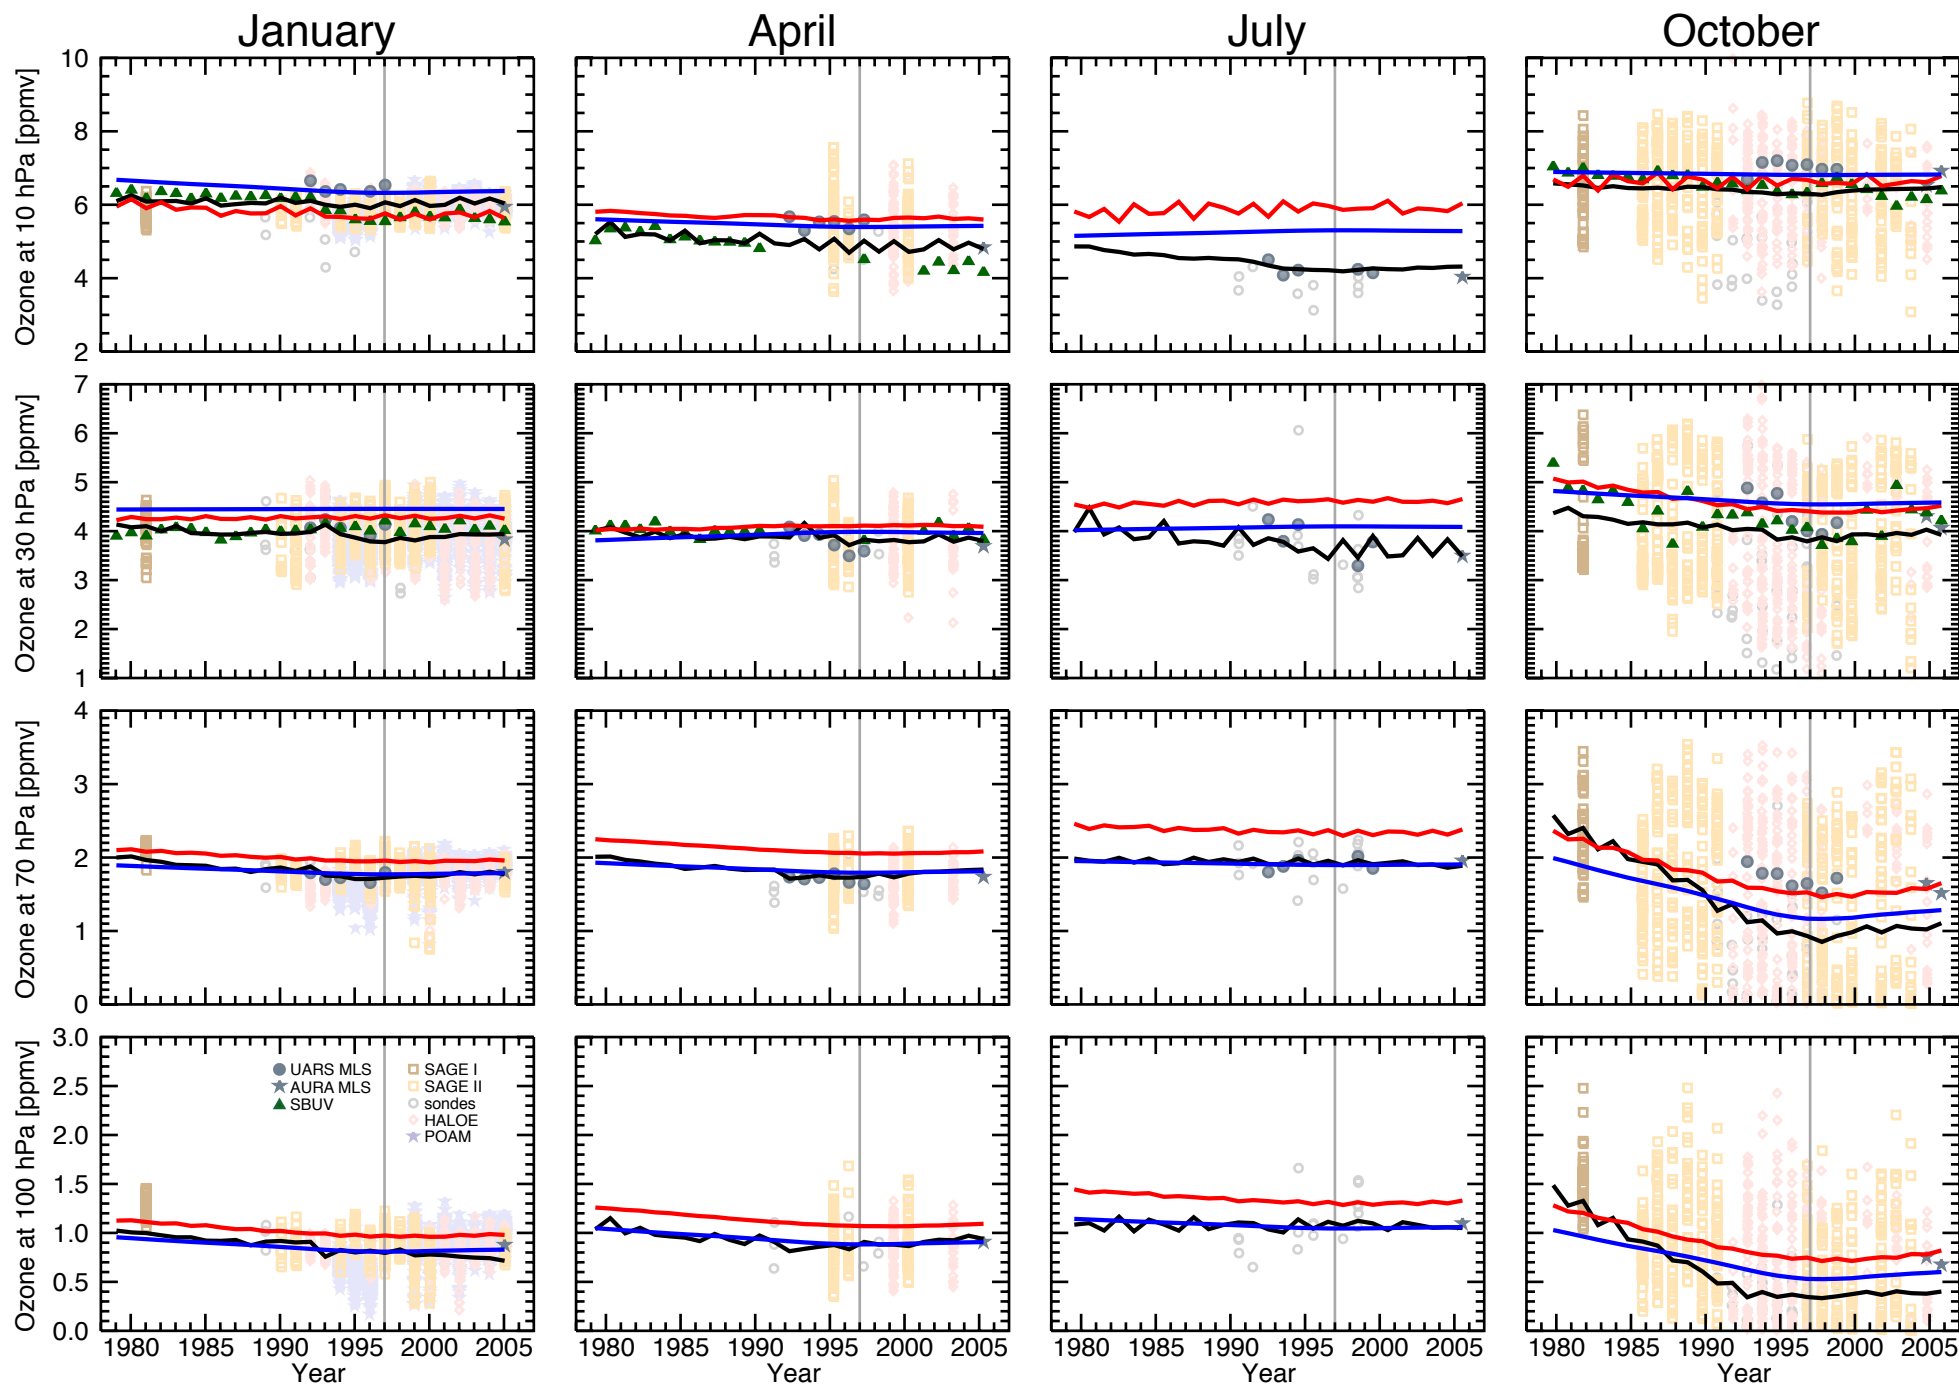

BDBP RW07 SPARC

Supplement: Supplementary file 16 [file acp-13-5533-2013-supplement.zip]
